# Supplementary material for: New insights into the cross-linking and degradation mechanism of Diels–Alder hydrogels
Source: Royal Society of Chemistry journal article supplement (doi:10.1039/c4tb01680g), 2014-11-07
Supplement: c4tb01680g1.pdf [file c4tb01680g1.pdf]

## SUPPLEMENTARY INFORMATION

### Hydrolytic stability of 8armPEG10k-maleimide

To demonstrate that the determined pseudo-first-order rate constants ( $k_{obs}$ ) are independent from the concentration of the starting material, 5 mg, 10 mg, and 20 mg of 8armPEG10k-maleimide were dissolved in 2 mL of 50 mM phosphate buffer (pH 7.4). The samples were placed in a Kontron UVIKON<sup>®</sup> 941 spectrophotometer (Kontron Instruments S.p.A, Milan, Italy) equipped with a temperature-controlled cell changer; 10 mm quartz cuvettes were used. The decrease in the absorbance at 299 nm (UV maximum of 8armPEG10k-maleimide) was monitored for 1200 min at 37 °C. All measurements were performed in triplicate. Assuming that the pH of the buffered solutions does not change during hydrolysis (constant OH<sup>-</sup> concentration), pseudo-first-order kinetic models were least-squares fitted to the experimental data to determine the hydrolysis rate constants ( $k_{obs}$ ) and half-lives ( $t_{1/2}$ ) of 8armPEG10k-maleimide. The plateau value was shared between all groups and  $k_{obs}$  was set greater than zero. The results are presented in Figure S1 and Table S1.

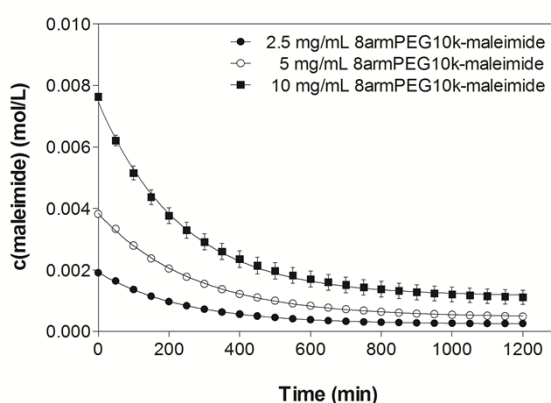

**Figure S1:** Hydrolytic stability of 8armPEG10k-maleimide at 37 °C and pH 7.4. The experimental data is indicated by symbols; the solid lines represent the least-squares fits of pseudo-first-order kinetic models. The experiments were carried out in triplicate and the results are presented as means  $\pm$  standard deviations.

**Table S1:** Pseudo-first-order rate constants ( $k_{obs}$ ) of the ring-opening hydrolysis and half-lives ( $t_{1/2}$ ) of 8armPEG10k-maleimide at 37 °C in 50 mM phosphate-buffer, pH 7.4 as a function of the polymer concentration.

| <b>c (polymer)<br/>(mg/mL)</b> | <b>c (maleimide)<br/>(mol/L)</b> | <b><math>k_{obs}</math> (s<sup>-1</sup>)</b> | <b><math>t_{1/2}</math> (min)</b> | <b><math>3 \cdot t_{1/2}</math> (days)</b> | <b><math>R^2</math></b> |
|--------------------------------|----------------------------------|----------------------------------------------|-----------------------------------|--------------------------------------------|-------------------------|
| 2.5                            | 0.001909                         | $7.06 \cdot 10^{-5}$                         | 164                               | 0.3                                        | 0.9972                  |
| 5.0                            | 0.003818                         | $6.38 \cdot 10^{-5}$                         | 181                               | 0.4                                        | 0.9990                  |
| 10.0                           | 0.007637                         | $7.04 \cdot 10^{-5}$                         | 164                               | 0.3                                        | 0.9827                  |
